# Supplementary material
Source: ML conference proceedings conference paper supplement (https://proceedings.mlr.press/v119/shen20b.html)
Supplement: Supplementary file 1 [file shen20b-supp.pdf]

## A. Appendix

We present two variants of DDPG with the proposed smoothness-inducing regularizer. The first algorithm, DDPG-SR-A, directly learns a smooth policy with a regularizer that measures the non-smoothness in the actor network (policy). The second variant, DDPG-SR-C, learns a smooth Q-function with a regularizer that measure the non-smoothness in the critic network (Q-function). We present the details of DDPG-SR-A and DDPG-SR-C in Algorithm 2 and Algorithm 3, respectively.

---

**Algorithm 2** DDPG with smoothness-inducing regularization on the actor network (DDPG-SR-A).

---

**Input:** step size for target networks  $\alpha \in (0, 1)$ , coefficient of regularizer  $\lambda_s$ , perturbation strength  $\epsilon$ , number of iterations to solve inner optimization problem  $D$ , number of training steps  $T$ , number of training episodes  $M$ , step size for inner maximization  $\eta_\delta$ , step size for updating actor/critic network  $\eta$ .

**Initialize:** randomly initialize the critic network  $Q_\phi(s, a)$  and the actor network  $\mu_\theta(s)$ , initialize target networks  $Q_{\phi'}(s, a)$  and  $\mu_{\theta'}(s)$  with  $\phi' = \phi$  and  $\theta' = \theta$ , initialize replay buffer  $\mathcal{R}$ .

**for** episode = 1 . . . , M **do**

    Initialize a random process  $\epsilon$  for action exploration.

    Observe initial state  $s_1$ .

**for**  $t = 1 \dots T$  **do**

        Select action  $a_t = \mu_\theta(s_t) + \epsilon_t$  where  $\epsilon_t$  is the exploration noise.

        Take action  $a_t$ , receive reward  $r_t$  and observe the new state  $s_{t+1}$ .

        Store transition  $(s_t, a_t, r_t, s_{t+1})$  into the replay buffer  $\mathcal{R}$ .

        Sample mini-batch  $B$  of transitions  $\{(s_t^i, a_t^i, r_t^i, s_{t+1}^i)\}_{i \in B}$  from the replay buffer  $\mathcal{R}$ .

        Set  $y_t^i = r_t^i + \gamma Q_{\phi'}(s_{t+1}^i, \mu_{\theta'}(s_{t+1}^i))$  for  $i \in B$ .

        Update the critic network:  $\phi \leftarrow \operatorname{argmin}_{\tilde{\phi}} \sum_{i \in B} (y_t^i - Q_{\tilde{\phi}}(s_t^i, a_t^i))^2$ .

**for**  $s_t^i \in B$  **do**

            Randomly initialize  $\delta_i$ .

**for**  $\ell = 1 \dots D$  **do**

$\delta_i \leftarrow \delta_i + \eta_\delta \nabla_{\delta} \|\mu_\theta(s_t^i) - \mu_\theta(s_t^i + \delta_i)\|_2^2$ .

$\delta_i \leftarrow \Pi_{\mathbb{B}_d(0, \epsilon)}(\delta_i)$ .

**end for**

            Set  $\hat{s}_t^i = s_t^i + \delta_i$ .

**end for**

        Update the actor network:

$$\theta \leftarrow \theta + \frac{\eta}{|B|} \sum_{i \in B} \left( \nabla_a Q_\phi(s, a) \Big|_{s=s_t^i, a=u_\theta(s_t^i)} \nabla_\theta \mu_\theta(s) \Big|_{s=s_t^i} - \lambda_s \nabla_\theta \|\mu_\theta(s_t^i) - \mu_\theta(\hat{s}_t^i)\|_2^2 \right).$$

        Update the target networks:

$$\theta' \leftarrow \alpha \theta + (1 - \alpha) \theta',$$

$$\phi' \leftarrow \alpha \phi + (1 - \alpha) \phi'.$$

**end for**

**end for**

---

**Algorithm 3** DDPG with smoothness-inducing regularization on the critic network (DDPG-SR-C).

**Input:** step size for target networks  $\alpha \in (0, 1)$ , coefficient of regularizer  $\lambda_s$ , perturbation strength  $\epsilon$ , number of iterations to solve inner optimization problem  $D$ , number of training steps  $T$ , number of training episodes  $M$ , step size for inner maximization  $\eta_\delta$ , step size for updating actor/critic network  $\eta$ .

**Initialize:** randomly initialize the critic network  $Q_\phi(s, a)$  and the actor network  $\mu_\theta(s)$ , initialize target networks  $Q_{\phi'}(s, a)$  and  $\mu_{\theta'}(s)$  with  $\phi' = \phi$  and  $\theta' = \theta$ , initialize replay buffer  $\mathcal{R}$ .

**for** episode = 1 ... M **do**

Initialize a random process  $\epsilon$  for action exploration.

Observe initial state  $s_1$ .

**for**  $t = 1 \dots T$  **do**

Select action  $a_t = \mu_\theta(s_t) + \epsilon_t$  where  $\epsilon_t$  is the exploration noise.

Take action  $a_t$ , receive reward  $r_t$  and observe the new state  $s_{t+1}$ .

Store transition  $(s_t, a_t, r_t, s_{t+1})$  into replay buffer  $\mathcal{R}$ .

Sample mini-batch  $B$  of transitions  $\{(s_t^i, a_t^i, r_t^i, s_{t+1}^i)\}_{i \in B}$  from the replay buffer  $\mathcal{R}$ .

Set  $y_t^i = r_t^i + \gamma Q_{\phi'}(s_{t+1}^i, \mu_{\theta'}(s_{t+1}^i))$  for  $i \in B$ .

**for**  $s_t^i \in B$  **do**

Randomly initialize  $\delta_i$ .

**for**  $\ell = 1 \dots D$  **do**

$$\delta_i \leftarrow \delta_i + \eta_\delta \nabla_\delta (Q_\phi(s_t^i, a_t^i) - Q_\phi(s_t^i + \delta, a_t^i))^2.$$

$$\delta_i \leftarrow \Pi_{\mathbb{B}_d(0, \epsilon)}(\delta_i).$$

**end for**

Set  $\tilde{s}_t^i = s_t^i + \delta_i$ .

**end for**

Update the critic network:

$$\phi \leftarrow \underset{\tilde{\phi}}{\operatorname{argmin}} \sum_{i \in B} (y_t^i - Q_{\tilde{\phi}}(s_t^i, a_t^i))^2 + \lambda_s \sum_{i \in B} (Q_\phi(s_t^i, a_t^i) - Q_\phi(\tilde{s}_t^i, a_t^i))^2.$$

Update the actor network:

$$\theta \leftarrow \theta + \frac{\eta}{|B|} \sum_{i \in B} \nabla_a Q_\phi(s, a) \Big|_{s=s_t^i, a=\mu_\theta(s_t^i)} \nabla_\theta \mu_\theta(s) \Big|_{s=s_t^i}.$$

Update the target networks:

$$\theta' \leftarrow \alpha \theta + (1 - \alpha) \theta',$$

$$\phi' \leftarrow \alpha \phi + (1 - \alpha) \phi'.$$

**end for**

**end for**
